# Supplementary material for: Submicron-Sized Nanocomposite Magnetic-Sensitive Carriers: Controllable Organ Distribution and Biological Effects
Source: PubMed Central journal article supplement (PMC6630964; doi:10.3390/polym11061082), 2019-06-25
Supplement: polymers-11-01082-s001.pdf [file polymers-11-01082-s001.pdf]

# Submicron-sized nanocomposite Magnetic-sensitive Carriers: controllable Organ Distribution and Biological Effects

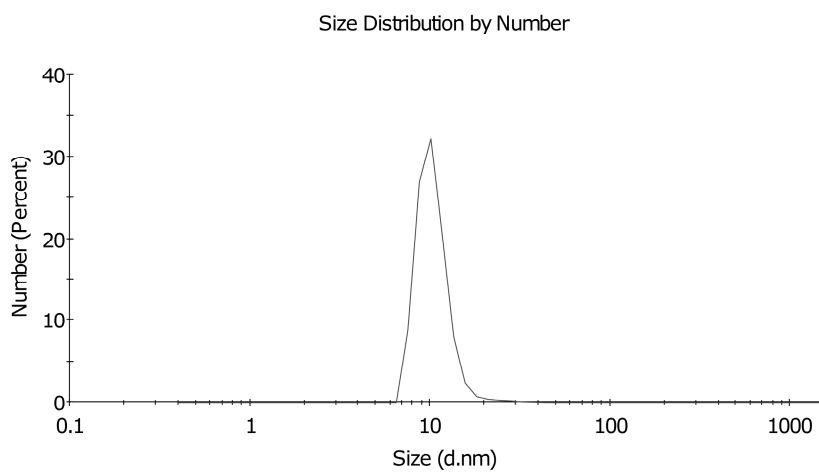

Figure S1 –DLS of magnetite particles

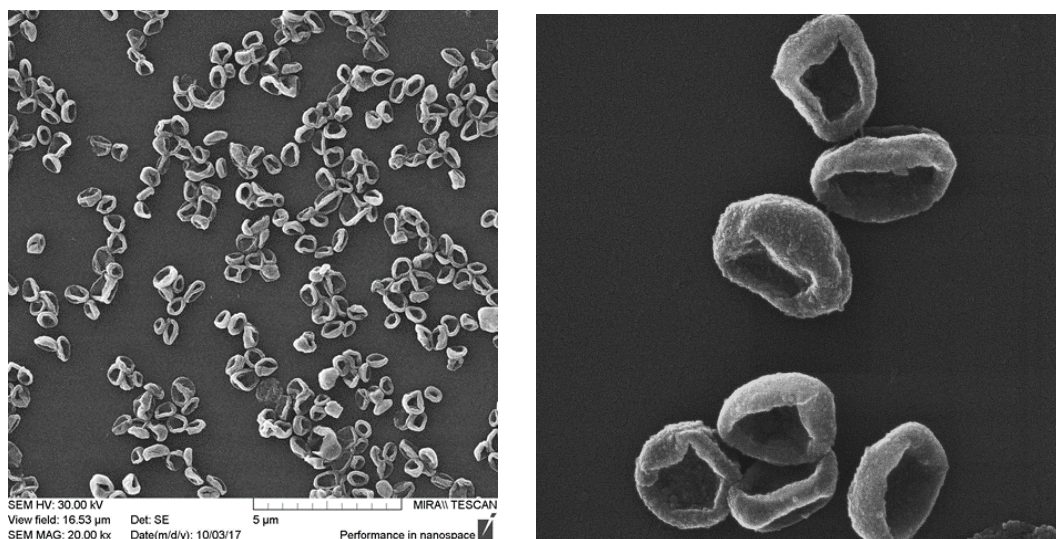

Figure S2 – SEM images of BSA/TA capsules (without MNPs)

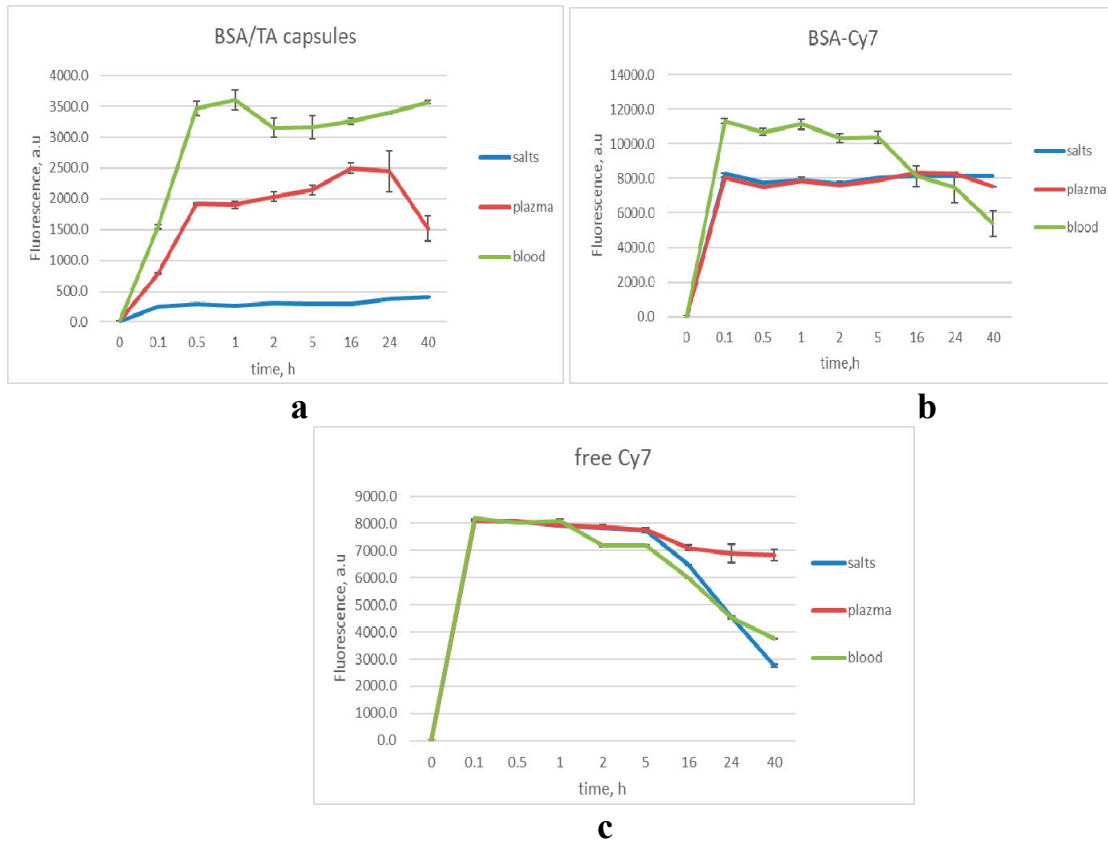

Figure S3 - The effect of various biological fluids on the carrier stability

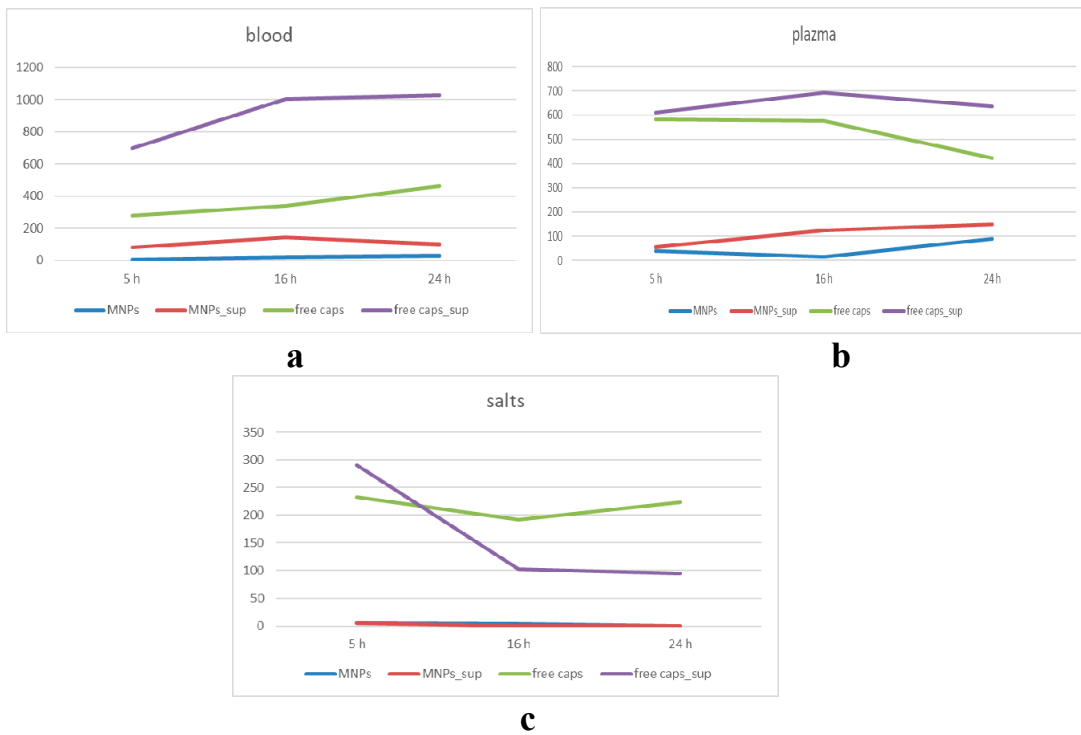

Figure S4 - The effect of various biological fluids on the MNPs (BSA/TA) carrier stability after centrifugation

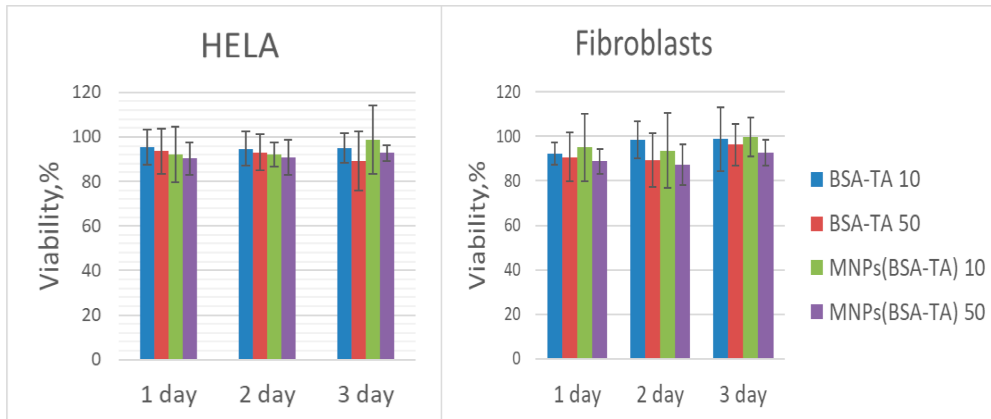

**Figure S5** - The percent of viable cells (a- Hela, b- fibroblasts) after incubation (free cells set as 100%), with added BSA-TA and MNPs(BSA-TA) carriers measured by Alamar blue method. The carriers were added to cells at concentration from 10 to 50 capsules per cell.

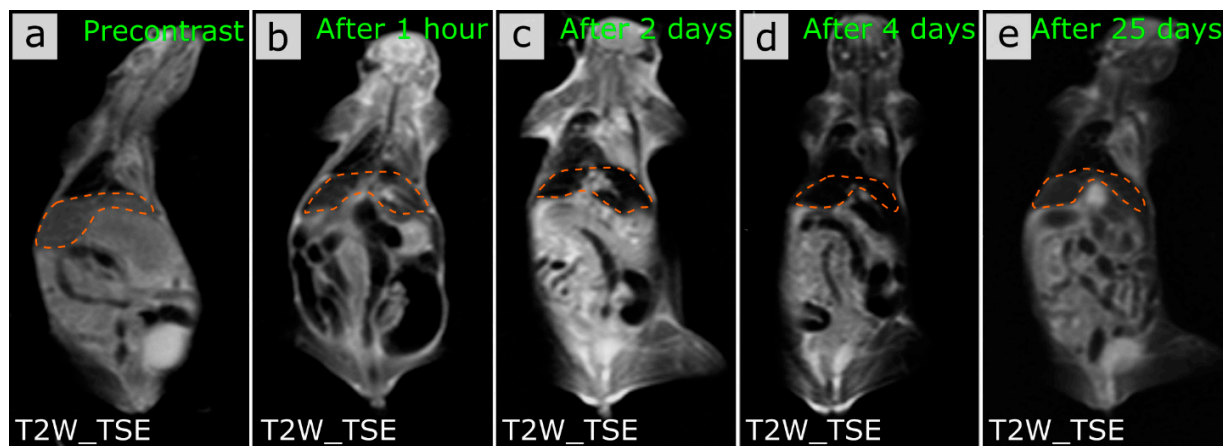

**Figure S6** - MR T2 images of mouse before and 1 hour, 2, 4, 25 days after intravenous injection of a microcapsule suspension. The dotted orange line shows the area of the liver
